# Supplementary material
Source: publisher figshare collection journal article supplement (https://iop.figshare.com/ndownloader/files/17069504)
Supplement: Supplementary file 1 [file 17069504]

vegt	ca_mg	TF	sand	silt	clay	na	h	al	t	v	m	sb	co	k	ph_h2o	ki	kr	fe2o3	ann.temp	warm.q.temp	cold.q.temp	ann.pre	wet.m.pre	dry.m.pre	se.pre	wet.q.pre	dry.q.pre	warm.q.prec	cold.q.pre	d.range	isoterm	se.temp	warm.m.maxtemp	cold.m.mintemp	temp.a.range	wet.q.temp	dry.q.temp
Caatinga	5.1	410	750	130	120	0.03	3.1	0	8.5	63	0	0	10.3	0.29	5.5	1.89	1.4	2.9	253	265	234	878	232	5	109	599	15	242	61	96	73	1197	320	189	131	260	247
Caatinga	14.8	960	600	240	160	0.07	2	0	17.6	89	0	15.6	23.3	0.7	7.2	2.87	1.98	5.6	255	268	236	746	216	2	115	540	8	228	45	91	72	1232	321	196	125	264	247
Caatinga	49.5	950	310	270	420	0.22	0	0	49.8	100	0	49.8	5.9	0.11	8.5	3.51	2.82	42	238	253	214	444	93	2	88	239	7	216	9	124	74	1580	319	152	167	253	218
Caatinga	14.9	1000	420	150	430	0.06	0.5	0	16.2	97	0	15.7	10.4	0.78	8	2.32	1.86	54	273	280	264	827	209	1	104	530	4	24	228	101	80	647	338	212	126	268	279
Caatinga	57	1000	80	220	700	0.62	0	0	58.4	100	0	58.4	7.3	0.78	8.1	3.35	2.44	86	266	279	252	925	249	4	105	619	20	61	126	112	75	1027	343	194	149	264	268
Caatinga	11.6	910	580	170	250	0.07	1	0	13	92	0	12	7.1	0.33	7.2	2.17	1.57	54	245	260	225	557	146	3	96	340	17	143	27	106	69	1383	323	171	152	252	231
Caatinga	2.1	990	800	100	100	0.02	2.9	0.1	5.3	43	4	2.3	7	0.17	5.1	2.01	1.49	21	245	257	225	533	127	1	90	293	7	140	11	131	77	1286	327	157	170	252	230
Cerrado	0.9	990	580	140	280	0.05	5.8	1	7.8	13	50	1	14.1	0.08	5.3	1.96	1.39	59	262	274	253	1091	184	2	79	513	11	99	178	115	73	826	342	186	156	258	262
Cerrado	0.1	1000	500	280	220	0.03	4	1.3	5.5	4	87	0.2	10.3	0.03	4.6	1.89	1.57	29	259	271	249	1062	180	2	79	500	10	91	169	115	73	848	340	184	156	255	258
Cerrado	0.2	1000	420	90	490	0.06	9.1	2.7	12.1	2	90	0.3	19.9	0.06	4.5	1.82	1.45	76	259	271	251	1072	184	2	79	505	10	96	170	117	74	754	340	182	158	254	260
Cerrado	0.2	1000	620	80	300	0.03	2.6	0.8	3.6	6	80	0.2	7.5	0.02	5	2.1	1.69	47	257	268	249	1052	175	1	79	495	8	96	166	118	74	748	338	179	159	252	258
Arb.Caatinga	0.2	990	640	160	200	0.01	2.6	1.2	4.1	7	80	0.3	7.8	0.11	4.6	1.89	1.6	23	242	252	229	862	146	1	86	434	4	191	4	144	74	882	335	142	193	245	229
Cerrado	0.6	1000	770	110	120	0.01	3.6	0.8	5	12	57	0.6	6.9	0.03	4.7	1.9	1.55	18	265	279	255	1311	285	5	84	703	31	166	318	114	71	995	349	190	159	256	260
Cerrado	0.2	1000	790	60	150	0.01	2.6	0.9	3.7	5	82	0.2	7.2	0.02	4.7	1.89	1.69	12	251	263	242	987	171	2	80	486	9	94	135	120	74	804	335	173	162	246	251
Cerrado	0.3	1000	790	100	110	0.02	4.1	1.1	5.6	7	73	0.4	7.9	0.05	4.9	2.19	1.85	15	274	288	264	1001	183	2	79	506	19	71	351	109	73	940	353	205	148	268	274
Arb.Caatinga	0.9	980	790	70	140	0.02	1.4	0.3	2.9	41	20	1.2	2.5	0.24	4.8	2.31	2.09	9	264	276	250	655	167	1	101	399	6	138	20	113	75	1004	340	190	150	264	251
Arb.Caatinga	0.1	1000	730	90	180	0.02	2.2	0.6	3	7	75	0.2	4.5	0.06	4.7	1.91	1.64	19	266	276	256	862	160	2	84	434	8	161	23	131	79	768	348	183	165	266	258
Cerrado	1	1000	320	90	590	0.05	8.2	2	11.3	10	65	1.1	19.6	0.05	4.5	1.97	1.68	60	257	268	249	1037	176	1	78	484	8	97	165	118	74	738	338	179	159	252	257
Cerrado	0.6	1000	840	40	120	0.04	4.2	1.2	6.1	11	63	0.7	11.4	0.03	4.9	2.02	1.35	33	248	260	240	930	155	2	79	450	10	94	124	122	73	791	334	169	165	243	247
Cerrado	0.8	1000	880	20	100	0.03	2.9	0.7	4.5	20	44	0.9	5.6	0.03	4.8	2.13	1.28	33	248	259	239	932	155	2	79	450	10	94	125	122	73	772	334	169	165	243	247
Cerrado	0.8	1000	880	20	100	0.02	1.8	0.2	2.9	31	18	0.9	4.4	0.03	5.3	2.17	1.75	11	261	272	254	1045	179	1	79	495	8	92	163	118	73	736	343	182	161	256	262
Arb.Caatinga	0.5	1000	830	50	120	0.01	1.7	0.6	2.9	18	50	0.6	5.5	0.04	4.4	1.88	1.58	14	245	259	233	880	201	2	93	503	10	83	49	111	72	1066	325	172	153	239	244
Cerrado	0.6	500	690	150	160	0.05	2.6	1.2	4.6	17	60	0.8	8.2	0.11	4.7	2.04875739833336	1.64069024204851	27.2382883803579	273	281	266	1475	306	16	88	827	48	57	827	100	79	697	338	212	126	266	280
Cerrado	0.7	1000	890	60	50	0.02	0.9	0.2	1.9	42	20	0.8	2.9	0.06	5.2	2.05	1.77	6	274	286	264	992	187	1	82	523	12	73	353	112	75	872	352	204	148	268	274
Caatinga	3.2	950	720	140	140	0.05	1	0	4.5	78	0	3.5	4.2	0.24	6	2.9	2.02	28	259	271	242	498	116	1	91	279	7	129	7	127	75	1115	340	172	168	261	242
Arb.Caatinga	19.2	1000	470	240	290	0.18	3.7	0	24	85	0	20.3	13.1	0.94	6	3.49	2.18	72	265	282	248	723	178	0	99	439	6	61	29	108	69	1357	344	189	155	263	263
Cerrado	0.2	1000	790	130	80	0.02	3	1	4.2	5	83	0.2	8.8	0.03	4.5	1.79	1.45	14	263	274	253	948	161	2	80	465	9	71	150	117	75	800	343	188	155	259	261
Cerrado	1.95	920	210	630	160	0.06	1.6	1.8	5.2	33	50	1.8	7.2	0.15	5.1	2.2	1.54	41	269	277	262	1320	291	8	93	778	32	40	778	100	80	633	333	209	124	262	275
Arb.Caatinga	4.2	990	740	120	140	0.03	1.2	0	5.9	80	0	4.7	9.7	0.47	6.2	2	1.78	9	236	248	213	872	198	0	97	538	3	358	3	122	71	1482	313	143	170	245	213
Dry.For.	3	940	700	150	150	0.01	1.5	0	4.6	67	0	3.1	6.4	0.13	5.5	2.07	1.88	10	232	249	205	874	185	3	90	515	14	336	14	131	69	1792	318	130	188	245	205
Dry.For.	13.6	1000	60	340	600	0.04	2.6	0	17.8	85	0	15.2	19.8	1.57	6.2	2.2	1.66	63	242	255	223	839	195	0	97	502	1	237	6	132	69	1262	331	142	189	249	224
Dry.For.	21.4	1000	110	340	550	0.07	2.1	0	24.7	91	0	22.6	28.6	1.17	6.9	2.37	1.74	60	243	256	225	874	204	0	96	516	1	252	1	130	70	1253	330	145	185	249	225
Dry.For.	1.5	1000	20	180	800	0.04	8.3	1.4	11.5	16	44	1.8	23	0.25	4.6	1.81	1.56	72	225	237	204	751	119	15	56	316	63	265	82	112	73	1328	299	147	152	235	210
Arb.Caatinga	1.7	990	670	60	270	0.02	2.7	0.2	4.7	38	10	1.8	6.8	0.1	5	1.99	1.68	29	219	230	198	845	183	2	92	510	8	323	8	112	71	1380	292	136	156	228	198
Dry.For.	2.4	980	650	100	250	0.02	2.5	0.2	5.5	51	7	2.8	8.5	0.38	5.1	2.05	1.78	21	233	248	212	771	121	16	56	337	65	318	76	91	70	1412	298	168	130	247	216
Cerrado	1.6	1000	680	80	240	0.11	3.3	0.4	5.5	33	18	1.8	9.7	0.1	5.2	1.96	1.66	24	199	211	179	702	115	15	57	302	68	264	86	96	73	1313	262	131	131	209	186
Cerrado	0.7	990	810	70	120	0.02	1.8	0.3	2.9	28	27	0.8	4	0.03	4.7	2.06	1.88	8	230	246	208	980	134	46	33	357	167	216	285	84	66	1498	295	169	126	225	229
Arb.Caatinga	1.9	980	730	90	180	0.03	1.9	0.1	4.2	52	4	2.2	7.6	0.24	5	2.19	1.85	19	230	246	208	745	102	20	42	269	85	260	130	100	71	1531	302	162	140	243	221
Arb.Caatinga	3.6	850	600	170	230	0.02	2.4	0	6.5	63	0	4.1	13.5	0.47	5.3	2.16	1.66	37	193	203	173	1002	148	33	44	389	125	316	154	116	71	1262	269	107	162	202	180
Dry.For.	7.7	980	650	240	110	0.21	2.3	0	10.6	78	0	8.3	9.1	0.36	6.2	4.34	2.47	3.2	250	264	231	818	122	14	59	346	57	200	293	93	72	1279	317	188	129	247	256
Caatinga	7.5	670	530	330	140	0.14	2.1	0	10.2	79	0	8.1	13.6	0.45	5.9	1.91	1.5	3.1	240	252	222	708	203	2	116	518	7	216	40	91	73	1162	306	182	124	248	233
Dry.For.	1	980	730	60	210	0.02	4.3	1	6.4	17	48	1.1	9.9	0.06	4.3	2.03	1.65	24	233	250	211	743	80	33	23	221	122	184	194	76	63	1540	294	174	120	228	221
Caatinga	6.3	900	630	190	180	0.05	1	0	7.7	87	0	6.7	9.9	0.36	6.9	2.58	2.07	30	265	280	251	876	217	7	96	544	33	60	322	104	72	1184	343	199	144	258	271
Dry.For.	46.4	980	280	260	460	0.49	0	0	47	100	0	47	6.5	0.15	7.4	4.87	2.8	9.4	238	252	220	734	114	13	60	309	49	188	261	89	71	1254	305	180	125	232	245
Dry.For.	6.4	1000	310	200	490	0.03	1.6	0	8.6	81	0	7	14.7	0.52	6.2	1.82	1.62	38	229	240	209	818	136	16	57	347	68	283	81	113	73	1287	303	150	153	239	214
Caatinga	4.6	820	720	200	80	0.09	0.9	0	6	85	0	5.1	5.6	0.39	6.9	3.11	1.9	2.9	226	239	207	406	93	2	88	226	12	153	96	90	71	1253	292	166	126	231	225
Caatinga	3.8	920	650	250	100	0.04	3.2	0.2	7.3	53	5	3.9	4.4	0.08	5.7	3.04	2.16	3	254	268	234	1072	271	6	103	710	26	165	77	99	71	1330	324	186	138	261	248
Arb.Caatinga	1.8	980	770	160	70	0.05	1.5	0	3.5	57	0	2	3.3	0.1	5.9	2.48	2.04	0.8	224	237	205	990	160	16	61	424	61	271	333	93	73	1262	290	163	127	229	230
Arb.Caatinga	7.2	990	360	210	430	0.03	3.1	0.1	10.7	70	1	7.5	17.5	0.25	5.8	1.81	1.16	124	253	264	238	1008	236	0	95	576	1	279	4	130	75	949	335	163	172	256	242
Arb.Caatinga	5.3	930	690	180	130	0.05	1.1	0	6.5	83	0	5.4	9.6	0.05	6.6	2.18	1.73	23	250	260	239	617	172	4	105	404	18	58	193	101	77	853	318	187	131	244	254
Caatinga	5.6	910	520	360	120	0.04	1.5	0	7.4	80	0	5.9	11.7	0.25	6.4	2.29	1.64	32	272	281	262	1091	293	1	114	750	5	42	708	116	80	774	349	205	144	265	277
Arb.Caatinga	4.7	790	610	200	190	0.05	2	0	7	71	0	5	6.7	0.25	6.3	2.13	1.83	18	263	271	253	1031	269	1	109	685	7	45	653	112	80	733	336	197	139	257	266
Dry.For.	3.3	990	640	100	260	0.03	3.5	0.1	7.1	49	3	3.5	12.9	0.15	5.6	2.21	1.75	39	235	250	212	828	114	22	37	286	96	269	176	107	72	1517	310	162	148	246	230
Dry.For.	1.2	980	720	60	220	0.02	2.6	0.4	4.4	32	22	1.4	7.8	0.13	5.1	1.97	1.73	18	222	238	198	781	95	26	32	253	100	253	170	102	70	1582	296	152	144	238	214
Caatinga	8.6	880	610	230	160	0.09	2.3	0	11.3	80	0	9	9.5	0.29	6.3	2.58	1.69	48	275	285	264	815	221	1	117	568	5	23	568	114	79	822	353	209	144	264	281
Arb.Caatinga	1	970	850	50	100	0.02	3.1	0.5	4.7	23	31	1.1	5	0.1	4.5	2.11	1.93	5	239	256	214	672	95	15	41	253	72	236	131	110	71	1657	318	164	154	252	231
Arb.Caatinga	3.6	820	850	100	50	0.18	2.3	0.2	6.6	62	5	4.1	9	0.31	5.8	2.41	1.42	13	257	263	248	1161	267	12	93	683	36	151	151	81	77	583	308	204	104	258	254
Caatinga	0.7	960	900	70	30	0.05	1	0.4	2.3	39	31	0.9	1.9	0.18	5.6	3.09	2.29	6	277	286	268	1102	280	1	111	734	5	34	707	114	80	729	352	210	142	270	281
Caatinga	2.3	970	880	90	30	0.03	1.6	0	4.1	61	0	2.5	6	0.19	5.9	2.83	2.27	7	246	258	233	425	116	2	110	299	9	39	34	102	75	987	317	182	135	241	242
Caatinga	1.9	990	860	60	80	0.03	0.5	0	2.6	81	0	2.1	3	0.13	6.3	3.01	2.16	16	246	261	223	456	104	2	88	255	10	154	15	123	74	1541	329	164	165	256	228
Caatinga	4.5	970	850	110	40	0.11	2.2	0	7.2	69	0	5	10.5	0.34	6	2.55	2.06	6	263	270	255	937	236	5	99	585	16	114	99	93	78	544	324	205	119	262	266
Caatinga	5.2	320	650	190	160	0.06	1.7	0	7.2	76	0	5.5	12.5	0.19	6.5	1.96	1.54	33	263	270	255	950	258	1	113	652	6	90	83	83	79	566	315	211	104	261	266
Dry.For.	6.2	980	180	430	390	0.09	2.2	0	9.1	76	0	6.9	11	0.65	6.6	1.87	1.45	60	238	255	213	684	103	23	48	292	81	140	245	84	65	1664	303	174	129	220	238
Dry.For.	7.6	940	700	150	150	0.05	1.3	0	9.5	86	0	8.2	19.1	0.51	6.4	2.32	1.92	16	212	226	190	697	96	21	41	254	86	236	111	95	70	1437	278	144	134	223	204
Dry.For.	4	980	710	130	160	0.03	0.8	0	5.3	85	0	4.5	6.4	0.48	6.6	2.53	1.61	37	225	239	204	634	116	10	69	287	34	254	36	98	71	1386	291	154	137	236	207
Caatinga	4.3	770	420	500	80	0.08	1.4	0	6.2	77	0	4.8	8.7	0.46	6.5	2.62	1.66	45	271	280	260	987	264	1	112	662	6	36	652	117	80	824	349	203	146	263	276
Dry.For.	4.5	930	700	130	170	0.03	3	0	8	63	0	5	14.6	0.5	5.5	2.25	1.92	16	225	237	204	879	136	19	53	361	78	307	100	113	73	1351	299	146	153	235	210
Arb.Caatinga	3.8	990	690	110	200	0.02	1.5	0	5.8	74	0	4.3	6.3	0.47	6	2.29	1.89	22	227	239	211	799	158	1	90	452	5	235	12	125	71	1104	313	139	174	233	212
Caatinga	9.1	980	290	380	330	0.04	0	0	9.7	100	0	9.7	9.8	0.59	7.2	2.5	1.99	4	232	246	210	397	77	2	77	177	13	169	20	116	74	1450	308	152	156	244	215
Caatinga	2.1	980	770	140	90	0.05	0	0	2.4	100	0	2.4	3	0.2	7.1	2.03	1.57	1.2	252	264	236	656	120	0	90	337	3	134	3	137	72	1128	342	153	189	257	236
Caatinga	0.7	950	880	70	50	0.02	0.5	0	1.3	62	0	0.8	1.7	0.03	6.2	2.31	1.75	0.7	256	266	239	619	114	1	86	303	4	222	4	126	75	1087	335	169	166	262	239
Arb.Caatinga	1.7	990	840	90	70	0.08	1.4	0	3.3	58	0	1.9	5	0.12	5.7	2.46	1.64	1.4	236	251	214	614	104	12	59	267	49	233	61	94	69	1465	302	167	135	248	218
Cerrado	3.9	1000	770	50	180	0.07	4.1	0.2	8.5	49	5	4.2	14.1	0.18	5.5	1.77	1.67	0.7	237	252	216	1114	169	48	41	440	171	217	347	90	68	1490	305	174	131	233	234
Arb.Caatinga	17.4	950	210	510	280	0.14	2.4	0	20.6	88	0	18.2	20.6	0.64	6.5	2.22	1.71	6.3	240	256	215	633	84	21	35	221	77	199	129	114	71	1671	321	162	159	245	229
Caatinga	14.2	970	330	410	260	0.15	1.6	0	16.5	90	0	14.9	7.6	0.52	6.9	2.59	1.9	6.3	242	258	216	445	109	3	89	248	12	248	22	111	70	1707	322	165	157	258	232
Arb.Caatinga	4.9	880	460	360	180	0.23	3.1	0.1	8.7	63	2	5.5	9.6	0.38	5.6	2.5	1.79	2.9	241	259	217	537	74	14	44	213	62	140	150	89	66	1669	309	175	134	248	242
Arb.Caatinga	4.4	1000	810	120	70	0.02	1	0	5.6	82	0	4.6	6.6	0.22	6.1	2.89	2.3	0.8	249	260	230	790	185	1	97	474	3	207	3	127	71	1264	331	154	177	256	230
Arb.Caatinga	2.8	980	720	190	90	0.16	2.2	0.1	5.4	57	3	3.1	5.4	0.12	5	3.4	1.75	2.5	234	251	212	894	110	36	31	294	139	188	248	81	64	1577	299	173	126	229	222
Caatinga	8.8	980	660	220	120	0.2	0	0	9.2	100	0	9.2	5.7	0.2	7.2	3.35	2.44	1.8	234	252	209	521	83	11	51	215	47	210	72	113	71	1717	316	157	159	247	225
Cerrado	16.4	980	520	270	210	0.66	5.4	0	22.7	76	0	17.3	18.6	0.19	5.9	3.74	2.43	3.4	232	248	211	861	89	40	21	256	149	214	233	71	62	1488	290	177	113	228	220
Arb.Caatinga	17.3	980	570	220	210	0.16	0	0	18	100	0	18	15.2	0.53	7.7	3.32	2.38	2.6	242	259	216	601	98	11	51	246	74	190	110	113	71	1729	324	165	159	256	232
Caatinga	3.4	1000	790	120	90	0.13	1.3	0	5.1	75	0	3.8	3.3	0.27	6.5	3.18	2.16	1.7	246	263	220	804	109	28	36	298	109	206	203	118	72	1716	328	165	163	239	234
Cerrado	0.3	1000	870	60	70	0.03	1.1	0.2	1.7	24	33	0.4	2.9	0.05	5.1	1.78	1.58	4	254	269	233	1175	213	32	63	546	102	182	442	79	65	1456	315	195	120	250	265
Cerrado	0.2	990	900	50	50	0.01	0.8	0.2	1.2	17	50	0.2	1.4	0.02	5.4	2.4	2.02	5	249	266	226	1095	200	31	65	537	98	177	387	88	65	1610	319	185	134	245	261
Cerrado	1.2	590	610	190	200	0.1	2.3	1	4.8	31	40	1.5	11.1	0.15	5	2.23	1.72	24	245	256	228	1351	207	27	61	601	96	296	513	96	74	1121	309	180	129	233	250
Cerrado	1.3	990	570	120	310	0.05	3.2	1	5.6	25	42	1.4	8.6	0.09	5.4	1.84	1.61	24	249	260	233	1726	271	41	60	772	131	374	646	99	76	1059	314	184	130	238	254
Cerrado	1.5	980	550	170	280	0.04	2.6	0.3	4.5	36	16	1.6	6.5	0.1	5.1	1.99	1.69	28	240	256	219	1140	196	34	61	535	106	171	450	78	65	1463	300	181	119	225	251
Dry.For.	4.3	960	540	150	310	0.08	4	0.2	8.8	52	4	4.6	12.9	0.19	5.4	2.24	1.75	42	242	259	217	894	145	25	61	410	79	149	351	88	65	1675	311	176	135	225	250
Arb.Caatinga	1.6	1000	900	10	90	0.2	2	0.3	4.2	45	14	1.9	4.4	0.12	4.9	2.15	1.97	5	234	248	217	758	179	6	84	425	29	206	98	103	71	1234	306	162	144	237	234
Caatinga	49.5	950	310	270	420	0.22	0	0	49.8	100	0	49.8	5.9	0.11	8.5	3.51	2.82	42	238	253	213	444	93	2	88	239	7	216	9	123	73	1606	319	152	167	253	218
Dry.For.	3.2	960	420	300	280	0.09	3.3	0	7.1	54	0	3.8	13.8	0.48	5.8	2.02	1.49	54	235	252	210	651	96	20	47	273	78	136	228	84	65	1685	299	171	128	217	235
Dry.For.	4.7	990	260	440	300	0.13	2.1	0	7.3	71	0	5.2	13.2	0.39	6.2	2.22	1.7	47	239	255	217	869	140	30	53	372	94	168	311	86	67	1547	304	176	128	224	247
Arb.Caatinga	8.6	980	820	60	120	0.2	0	0	9.1	86.1883554846009	0	9.1	13	0.32	7	2.4	2.03	11	231	244	216	714	175	2	94	413	14	135	21	110	74	1083	305	158	147	236	222
Dry.For.	3.9	970	750	190	60	0.06	0.3	0	4.3	93	0	4	2.2	0.06	6.9	4.19	2.56	15	247	260	229	1103	166	24	60	478	82	250	405	100	74	1212	316	182	134	235	252
Dry.For.	9.6	840	400	370	230	0.37	3.2	0	14	77	0	10.8	18.7	0.78	6.3	2.77	1.98	34	230	246	208	810	130	28	51	352	95	144	297	81	65	1539	292	169	123	214	238
Caatinga	2.6	960	770	170	60	0.1	1.3054417611723	0.0316455712622339	4.3	79	1.28321997412636	3	4.5	0.31	6.3	2.27	1.95	7	242	256	226	800	201	4	90	465	26	226	44	111	74	1152	318	168	150	245	240
Dry.For.	25.5	990	60	420	520	0.27	0	0	27.6	100	0	27.6	57.3	1.8	7.7	2.72	2.11	63	242	257	220	765	124	25	54	328	82	148	273	85	67	1527	305	179	126	238	249
Dry.For.	4.7	950	670	230	100	0.19	2	0	7.3	73	0	5.3	7.6	0.37	5.9	3.27	2.06	25	213	229	189	1052	173	20	60	489	90	198	411	92	68	1620	285	151	134	194	224
Dry.For.	31.4	990	140	450	410	0.16	2.8	0	35.9	92	0	33.1	30.7	1.54	6.7	4.08	2.13	118	240	257	217	756	112	32	40	290	114	151	236	99	69	1583	313	171	142	235	239
Caatinga	15.9	980	430	260	310	0.44	0	0	16.7	100	0	16.7	11.9	0.32	7	2.58	2.28	21	236	249	219	798	132	16	62	348	61	181	305	87	70	1216	300	177	123	225	241
Dry.For.	4.7	980	590	180	230	0.2	3.4	0	8.7	61	0	5.3	8.5	0.43	5.6	2.47	2.09	26	231	247	207	775	182	8	89	464	29	133	89	96	69	1607	303	164	139	243	223
Dry.For.	21	970	430	260	310	1.36	0	0	22.8	100	0	22.8	14	0.39	8.4	3.64	2.05	87	246	259	227	995	165	20	60	428	76	222	383	92	71	1280	313	184	129	233	251
Arb.Caatinga	0.6	920	910	70	20	0.03	5	0	5.7	12	0	0.7	4	0.06	6.1	3.82	2.74	5	207	220	183	765	108	19	52	296	74	142	255	89	66	1536	280	147	133	196	219
Caatinga	0.8	1000	900	50	50	0.1	1.62918093253549	0.203609924793165	2.5	48	12.9804527680077	1.2	2.7	0.25	5.5	3.4	3.24	1	234	251	206	480	121	4	84	269	17	249	42	93	65	1811	308	166	142	248	222
Arb.Caatinga	7.8	970	450	240	310	0.08	1.6	0	10.2	84	0	8.6	12.4	0.76	6.1	1.99	1.62	42	221	230	202	870	202	1	97	542	4	349	8	110	73	1250	290	141	149	228	202
Caatinga	2.1	970	720	220	60	0.03	1.3	0	3.6	64	0	2.3	3.6	0.21	6	2.52	1.86	15	249	262	227	419	107	1	98	240	3	240	6	131	76	1404	330	159	171	262	231
Caatinga	3.7	1000	690	190	120	0.16	1.2	0	5.3	77	0	4.1	4.7	0.24	6.4	2.75	1.95	25	242	254	225	871	177	0	93	503	2	223	2	122	71	1170	323	152	171	248	225
Caatinga	0.8	790	850	120	30	0.06	1	0	1	100	0	0	0.9	0.14	7.1	2.48	1.78	8	245	261	218	454	112	2	92	255	12	192	22	109	69	1745	324	168	156	261	235
Cerrado	7.6	1000	850	100	50	0.08	0	0	8.1	100	0	8.1	14.1	0.4	7.2	3.2	2.46	8	249	261	230	777	178	1	96	464	3	205	3	127	71	1292	332	155	177	256	230
Dry.For.	6.1	1000	460	230	310	0.04	1.2	1	8.8	75	13	6.6	12.9	0.51	5.4	4.49	3.6	38	249	261	230	777	175	1	95	461	3	207	3	127	71	1309	332	154	178	256	230
Arb.Caatinga	28.2	920	220	410	370	0.24	0	0	28.8	100	0	28.8	40	0.33	8.2	2.65	2.1	38	238	255	215	633	93	16	49	261	70	148	192	92	68	1614	307	172	135	245	237
Arb.Caatinga	26.7	760	280	400	320	0.19	0	0	28.9	100	0	28.9	42.3	0.33	8.2	2.2	1.77	42	240	259	214	465	62	14	39	172	55	119	116	118	71	1778	326	160	166	244	229
Dry.For.	7.9	910	600	280	120	0.33	2	0	10.6	81	0	8.6	10.4	0.37	6.2	4.17	2.61	31	234	251	212	803	91	36	25	242	120	220	187	81	64	1560	298	173	125	240	223
Dry.For.	23.4	810	620	190	190	0.12	2.5	0	26.2	90	0	23.7	16.5	0.18	6.6	5.78	2.56	59	235	253	213	843	93	36	26	267	138	189	231	79	63	1571	299	175	124	231	222
Dry.For.	3.9	780	470	370	160	0.13	4.4	0.3	8.9	47	7	4.2	13.8	0.16	5.2	2.44	1.98	22	235	251	214	857	127	39	37	325	135	191	249	92	68	1486	305	171	134	231	233
Cerrado	0.3	940	730	100	170	0.01	5.4	2.1	7.9	5	84	0.4	14.4	0.11	4.2	2.08	1.85	14	222	233	203	972	148	17	55	410	80	352	99	116	73	1278	299	142	157	231	210
Cerrado	0.5	380	840	110	50	0.03	4.2	0.8	5.6	11	57	0.6	9.8	0.06	6.4	2.18	1.63	13	241	251	227	847	145	1	85	425	4	207	4	137	74	961	328	145	183	246	227
Cerrado	0.2	1000	600	80	320	0.03	3.7	1.2	5.2	6	80	0.3	9.7	0.02	4.3	1.97	1.9	7	179	188	159	979	139	34	40	366	126	311	156	112	72	1232	253	98	155	188	166
Cerrado	0.1	990	730	130	140	0.02	2	0.7	2.9	7	78	0.2	6.5	0.04	4.8	2.52	2.41	4	213	223	193	868	154	21	59	381	73	300	82	116	72	1275	288	128	160	222	199
Cerrado	0.5	970	510	350	140	0.02	2.3	0.5	3.4	18	45	0.6	7	0.05	5.1	2.05	1.43	49	217	231	193	727	156	2	92	437	11	276	11	113	69	1555	291	129	162	228	193
Cerrado	0.4	810	910	70	20	0.03	1.7	7.9	10.1	5	94	0.5	15.6	0.02	3.1	2.02786624429375	1.64797713627909	24.8810341581195	206	219	185	681	105	17	51	280	73	241	99	98	72	1382	271	136	135	216	203
Cerrado	0.2	850	860	90	50	0.02	3.2	1.1	4.6	7	79	0.3	7.5	0.04	3.9	2.09	1.73	7	216	228	201	832	163	1	86	457	7	243	16	125	72	1041	301	129	172	221	202
Arb.Caatinga	0.8	970	920	40	40	0.02	0.8	0	1.8	56	0	1	1.8	0.13	6.5	2.27	1.87	2	228	244	205	556	67	17	36	188	66	181	102	101	70	1546	302	159	143	241	217
Arb.Caatinga	2.1	990	850	100	50	0.03	1.7	0	4.1	59	0	2.4	5.8	0.26	5.7	3.25	1.46	21	239	254	217	625	105	12	59	272	51	236	63	96	70	1446	306	170	136	250	220
Cerrado	1.4	1000	920	60	20	0.05	4.2	1.1	6.8	22	42	1.5	12.1	0.05	4.4	2.03373874078983	1.64905514921847	26.4582843847671	208	222	188	649	100	15	53	273	67	231	90	99	72	1387	275	139	136	219	206
Dry.For.	10.3	800	410	410	180	0.11	3.2	0	13.8	77	0	10.6	30.3	0.22	6.1	3.09	2.33	20	236	252	214	763	118	26	53	338	85	131	293	80	65	1541	298	175	123	220	244
Cerrado	6.5	570	490	310	200	0.1	1.3	0	8.1	84	0	6.8	16.2	0.16	6.5	2.25	1.86	26	241	258	218	984	142	38	44	396	138	180	347	95	67	1623	314	173	141	224	254
Arb.Caatinga	8.3	550	330	430	240	0.1	2.7	0	11.4	76	0	8.7	23.6	0.34	6.4	2.41	1.99	23	242	260	219	983	154	34	47	410	131	180	346	97	67	1648	317	173	144	225	256
Caatinga	4.9	910	620	220	160	0.1	1.3	0	6.7	81	0	5.4	10.2	0.42	6.4	2.17	1.44	49	260	271	247	918	237	4	104	596	20	111	93	102	76	894	327	194	133	262	259
Caatinga	3.7	940	920	50	30	0.04	0	0	4	100	0	4	6.6	0.21	8	1.51	1.28	5	274	281	265	929	239	2	106	611	10	17	244	101	80	632	337	211	126	270	280
Arb.Caatinga	4.9	990	780	150	70	0.04	0	0	5.1	100	0	5.1	4	0.12	7.5	2.55	1.9	16	254	265	238	961	171	9	72	463	35	280	312	87	74	1040	311	194	117	257	258
Caatinga	24.8	990	380	330	290	0.14	0	0	25.9	100	0	25.9	15.1	0.99	7.9	2.26	1.71	79	273	280	264	827	209	1	104	530	4	24	228	101	80	647	338	212	126	268	279
Caatinga	9.7	990	680	90	230	0.08	1	0	11.9	92	0	10.9	6.3	1.09	6.8	3.07	2.45	26	257	268	241	501	129	1	103	317	7	216	75	86	74	1052	312	196	116	260	257
Caatinga	0.7	990	710	230	60	0.05	1	0.6	2.6	38	38	1	2.9	0.24	5.3	2.22	1.74	10	232	242	220	1090	279	5	104	705	19	130	236	101	77	849	299	168	131	232	232
Caatinga	22.8	960	530	250	220	0.16	0	0	23.4	100	0	23.4	19.4	0.49	7.6	3.05	1.9	83	272	279	264	892	229	1	105	581	8	20	240	101	80	617	336	210	126	267	278
Cerrado	0.3	1000	850	30	120	0.02	1.4	0.2	1.9	16	40	0.3	3.2	0.02	5.4	1.56	1.26	17	234	247	218	934	199	0	90	503	2	257	10	131	72	1054	319	138	181	238	225
Arb.Caatinga	1.5	980	790	110	100	0.08	0.9	0	2.7	67	0	1.8	4.7	0.2	6	2.44	1.65	24	245	263	218	645	105	14	60	303	57	97	246	90	66	1799	315	179	136	225	256
Dry.For.	2.1	960	840	60	100	0.04	1.2	0	3.5	66	0	2.3	5.1	0.2	6	2.04	1.72	13	243	260	221	925	169	18	67	471	72	139	397	93	68	1592	315	179	136	226	253
Dry.For.	14	940	660	190	150	0.28	3.3	0	17.8	81	0	14.5	17.9	0.2	6.3	3.36	2.19	37	232	247	209	1433	242	30	64	701	123	163	626	89	68	1506	301	171	130	215	241
Dry.For.	2.5	930	760	110	130	0.1	2.7	0.1	5.8	52	3	3	7.1	0.35	5.9	4.01	2.63	32	211	226	186	1050	175	20	60	490	89	144	415	91	68	1582	281	149	132	191	222
Cerrado	0.5	1000	830	140	30	0.02	0.8	0.1	1.5	40	14	0.6	2.3	0.06	5.4	3.97	3.27	3	258	264	244	614	114	0	90	316	2	222	2	138	78	835	342	166	176	264	244
Arb.Caatinga	6.2	710	690	230	80	0.14	0.9	0	7.5	88	0	6.6	7	0.31	6.6	3.52	2.15	29	250	268	222	575	89	13	55	258	59	124	206	88	64	1880	319	183	136	229	262
Arb.Caatinga	5.8	650	650	240	110	0.13	1.7	0	7.9	78	0	6.2	7.9	0.24	6.4	2.86	1.97	31	237	255	208	608	80	12	48	234	51	181	180	93	65	1921	310	167	143	244	239
Arb.Caatinga	0.8	990	830	90	80	0.02	1.5	0.4	2.8	32	31	0.9	4.8	0.09	5.1	2.24	1.86	8	254	268	241	814	159	1	88	422	4	219	11	138	73	1023	346	158	188	258	242
Arb.Caatinga	1.5	940	710	240	50	0.07	1.2	0.1	3	57	6	1.7	3.9	0.14	5.8	2.98	2.57	5	240	258	211	635	88	15	44	239	64	148	184	100	67	1929	316	167	149	246	243
Arb.Caatinga	2.4	930	830	130	40	0.04	0.6	0	3.2	81	0	2.6	4.5	0.12	6.9	3.25	2.52	5	243	261	215	627	99	13	57	291	56	100	245	89	64	1869	314	176	138	222	245
Cerrado	1	280	590	230	180	0.08	4.8	0.8	6.9	19	38	1.3	13.6	0.23	5.1	1.97	1.39	41	242	254	224	1009	183	0	87	524	4	235	4	154	68	1153	346	122	224	246	224
Cerrado	0.2	1000	920	40	40	0.02	1	0.3	1.5	13	60	0.2	2.5	0.02	5.2	2.06	1.57	7	228	241	214	914	170	0	83	463	5	268	11	136	73	1013	318	133	185	231	216
Arb.Caatinga	0.3	1000	980	10	10	0.03	1.2	0	1.6	25	0	0.4	3.9	0.04	5.8	2.30584617113349	1.82288801418245	15.7263708133217	250	261	233	861	155	0	89	451	1	217	1	147	71	1103	345	140	205	256	233
Dry.For.	7.1	1000	200	170	630	0.03	4.5	0.2	12	61	3	7.3	20.3	0.14	5.7	1.87	1.32	155	243	254	224	827	201	0	99	501	1	215	1	124	72	1291	323	151	172	251	224
Dry.For.	8.9	1000	280	280	440	0.06	1.9	0.08	11.38	83	1	9.4	13.5	0.42	6.4	2.55	1.8	63	243	255	223	838	201	0	95	488	4	245	8	122	70	1327	323	149	174	250	223
Dry.For.	13.1	1000	250	340	410	0.07	2.1	0	15.4	86	0	13.3	16.4	0.14	6.3	2.1	1.57	78	245	256	225	919	229	0	100	563	2	265	10	126	69	1344	330	148	182	252	225
Dry.For.	15	1000	260	480	260	0.01	2	0	17.3	88	0	15.3	5.7	0.26	6.4	2.51	1.9	33	244	256	224	818	195	0	95	488	4	244	9	127	69	1330	329	146	183	250	224
Dry.For.	24.7	990	310	270	420	0.19	2.7	0	28.3	90	0	25.6	49.7	0.69	7	2.05	1.44	134	246	257	226	900	220	0	98	546	2	261	10	126	68	1338	331	148	183	253	226
Dry.For.	7.1	1000	720	200	80	0.06	0.1	0	7.7	99	0	7.6	13.7	0.41	7.6	1.83	1.44	17	244	255	223	835	200	0	94	485	3	245	7	122	70	1367	323	150	173	251	223
Cerrado	0.3	640	690	80	230	0.01	3.39256987284194	0.7	5.24639286504901	14.9812949809883	64	0.4	4.8	0.05	4.7	1.91	1.58	29	275	291	266	1386	313	6	91	811	29	103	146	114	70	1042	363	201	162	267	279
